# Supplementary material for: PEGylated Gd(OH)3 nanorods as metabolizable contrast agents for computed tomography imaging
Source: Royal Society of Chemistry journal article supplement (doi:10.1039/c5nj01980j), 2015-01-01
Supplement: c5nj01980j1.pdf [file c5nj01980j1.pdf]

## Supporting Information for

### **PEGylated Gd(OH)<sub>3</sub> nanorods as metabolizable contrast agents for computed tomography imaging**

*Yingda Du,<sup>a,\*</sup> Ming Xing,<sup>a</sup> Zhiman Li,<sup>b</sup> and Wei Guo<sup>a</sup>*

<sup>a</sup> National & Local United Engineering Laboratory for Chinese Herbal Medicine Breeding and Cultivation, Key Laboratory for Molecular Enzymology and Engineering of Ministry of Education, National Engineering Laboratory for AIDS Vaccine, and School of Life Science, Jilin University, Changchun 130012 (P. R. China)

E-mail: [duyingdajlu@163.com](mailto:duyingdajlu@163.com)

<sup>b</sup> Laboratory Animal Center of Jilin University, Changchun 130021 (P. R. China)

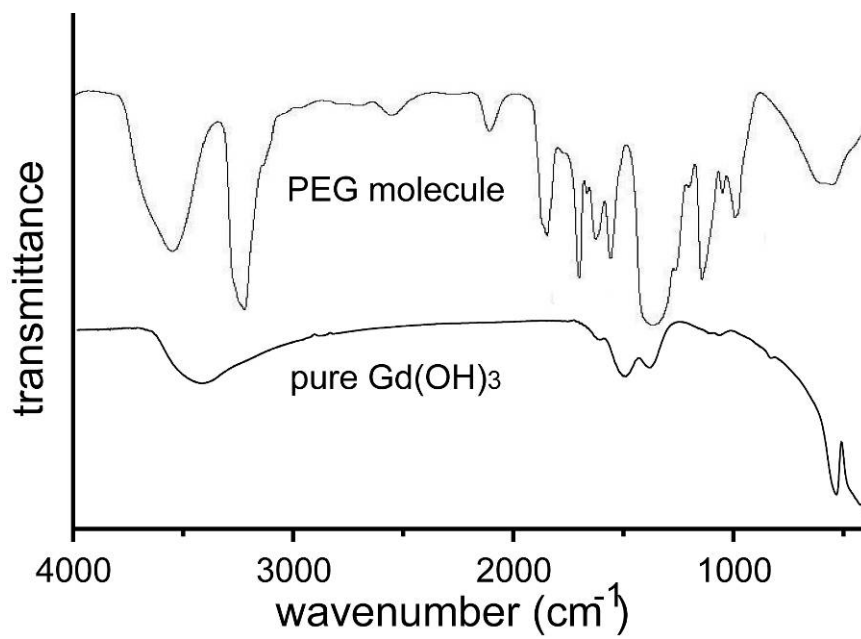

**Fig. S1.** FT-IR spectrum of PEG molecule and PEG-Gd(OH)<sub>3</sub>.

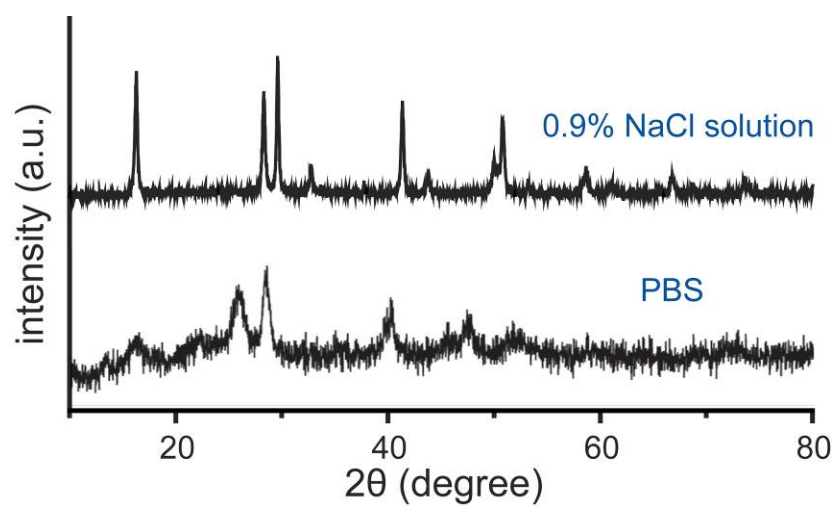

**Fig. S2.** Wide-angle XRD patterns of PEG-Gd(OH)<sub>3</sub> treated with 0.9% NaCl solution and PBS for one week.

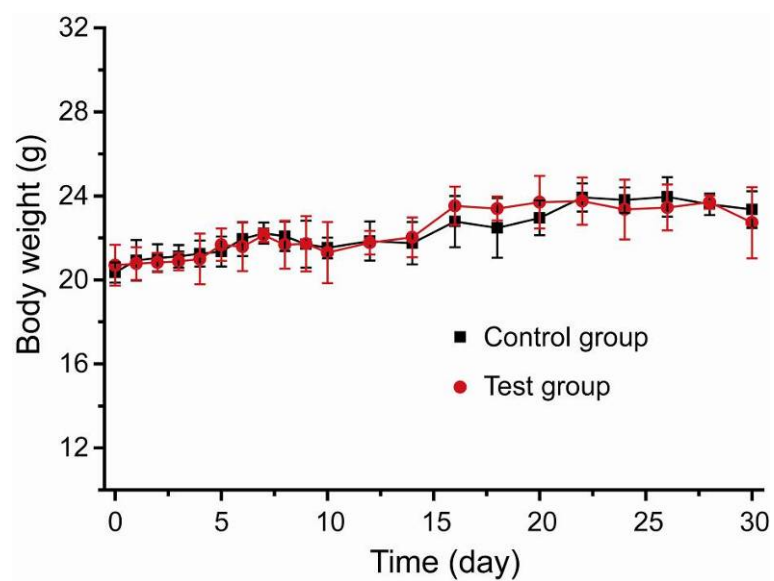

**Fig. S3.** Body-weight change of mice after intravenous injection of PEG-Gd(OH)<sub>3</sub> (test group) and 0.9% NaCl solution (control group).

**Table S1.** Value of hemolysis percentage upon the treatment of PEG-Gd(OH)<sub>3</sub>.

| Concentrations ( mg mL <sup>-1</sup> ) | Value of hemolysis (%) |
|----------------------------------------|------------------------|
| 0.9 % NaCl solution                    | 0                      |
| D. I. water                            | 100                    |
| 0.0625                                 | -0.521                 |
| 0.125                                  | 0.234                  |
| 0.25                                   | 0.534                  |
| 0.5                                    | 0.954                  |
| 1                                      | 1.057                  |

**Table S2.** CT values of the heart, liver, spleen, and kidneys of a rat before and after intravenous administration of PEG-Gd(OH)<sub>3</sub> at different timed intervals.

| Time          | Heart | Liver | Spleen | Kidneys   |
|---------------|-------|-------|--------|-----------|
| Pre-injection | 53.3  | 55.7  | 52.3   | 46.3/46.9 |
| 20 min        | 52.7  | 102.4 | 89.6   | 46.4/47.1 |
| 40 min        | 53.2  | 153.6 | 124.3  | 46.1/47.2 |
| 60 min        | 52.4  | 178.4 | 156.3  | 47.3/46.4 |
